# Supplementary material for: Orientated hydrogen chains favor superconductivity in germanium sulfur hydrides
Source: Royal Society of Chemistry journal article supplement (doi:10.1039/d4tc00511b), 2024-01-01
Supplement: d4tc00511b1.pdf [file d4tc00511b1.pdf]

## Supplementary Materials

# Orientated hydrogen chains favor superconductivity in germanium sulfur hydrides

Xiaojun Wang<sup>1</sup>, Xiao Tang<sup>1</sup>, Limin Shi<sup>1</sup>, Xin Chen<sup>1,2\*</sup> and Xiaobing Liu<sup>1,2</sup>

1. Laboratory of High Pressure Physics and Material Science (HPPMS), School of Physics and Physical Engineering, Qufu Normal University, Qufu, Shandong, 273165, China.

2. Advanced Research Institute of Multidisciplinary Science, Qufu Normal University, Qufu, Shandong, 273165, China

\*Email: [chenxin@qfnu.edu.cn](mailto:chenxin@qfnu.edu.cn)

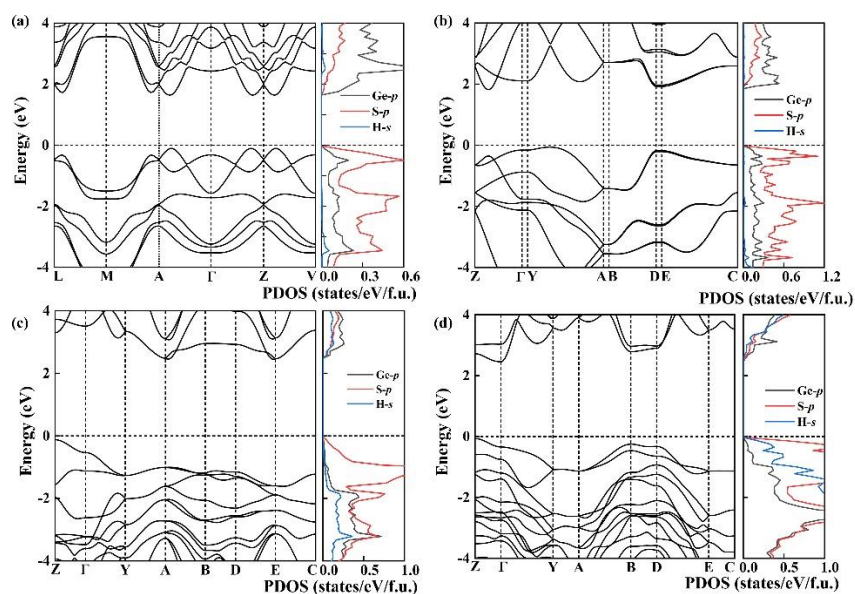

FIG. S1 Calculated electronic band structures and partial density of states (PDOS). (a)  $C2$   $\text{GeSH}_{12}$  at 0 GPa, (b)  $C2/c$   $\text{GeSH}_{14}$  at 0 GPa, (c)  $P2_1$   $\text{GeSH}_{14}$  at 20 GPa and (d)  $P2_1$   $\text{GeSH}_{16}$  at 20 GPa.

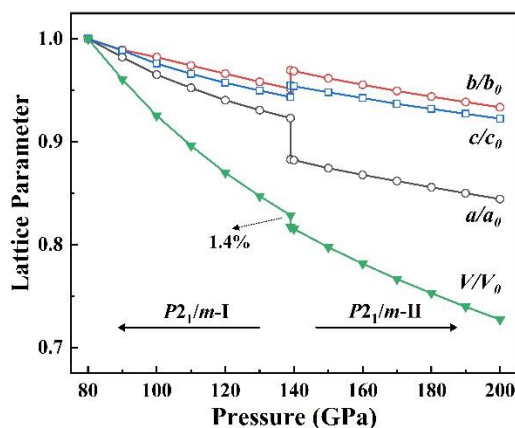

FIG. S2 The change of lattice parameters for  $P2_1/m$   $\text{GeSH}_{14}$  with respect to pressure.

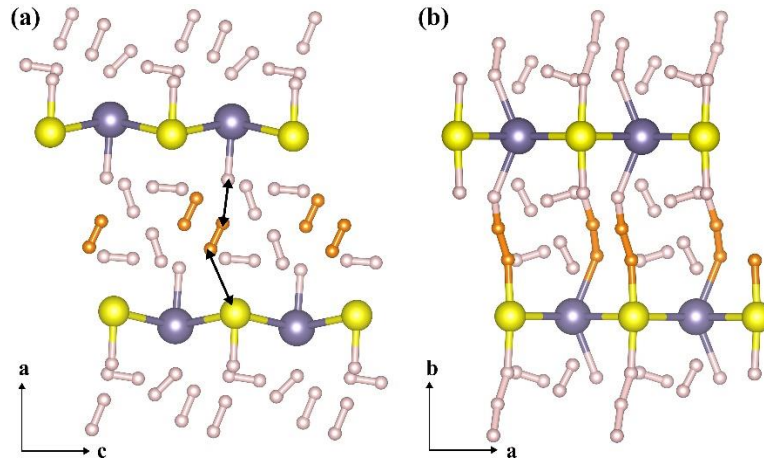

FIG. S3 The optimized crystal structures of (a)  $P2_1/m$ -I and (b)  $P2_1/m$ -II  $\text{GeSH}_{14}$  at 139 GPa.

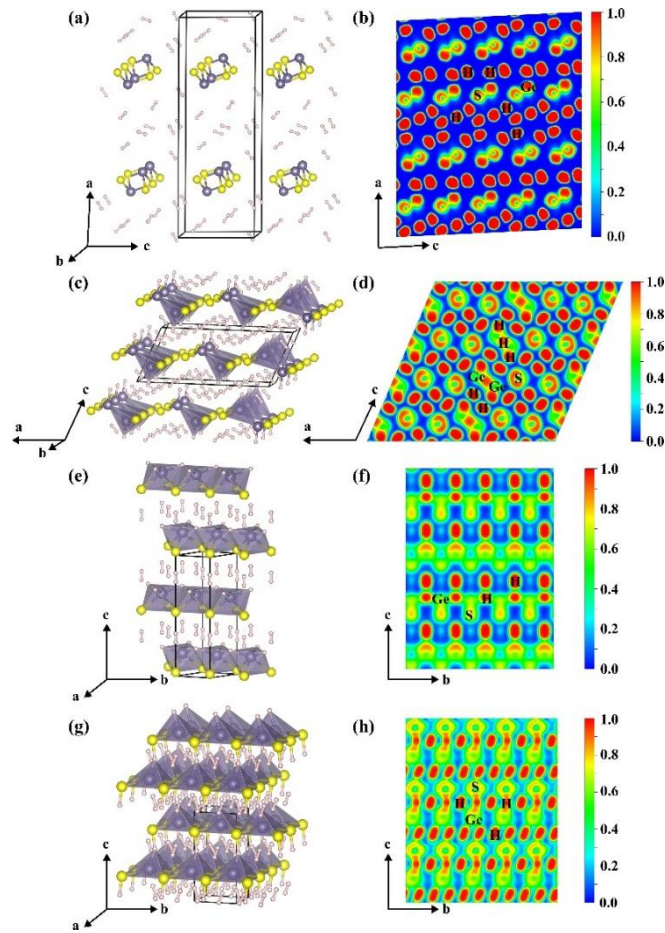

FIG. S4 The optimized crystal structures and corresponding valence electron localization function (ELF) for  $\text{GeSH}_7$  at high pressure. (a) The  $Cm$  phase at 0 GPa and its ELF at (b). (c) The  $C2/m$  phase at 20 GPa and its ELF at (d). (e) The  $P6_3mc$  phase at 60 GPa and its ELF at (f). (g) The  $Pmn2_1$  phase at 140 GPa and its ELF at (h). Purple, yellow and pink spheres represent Ge, S and H atoms, respectively.

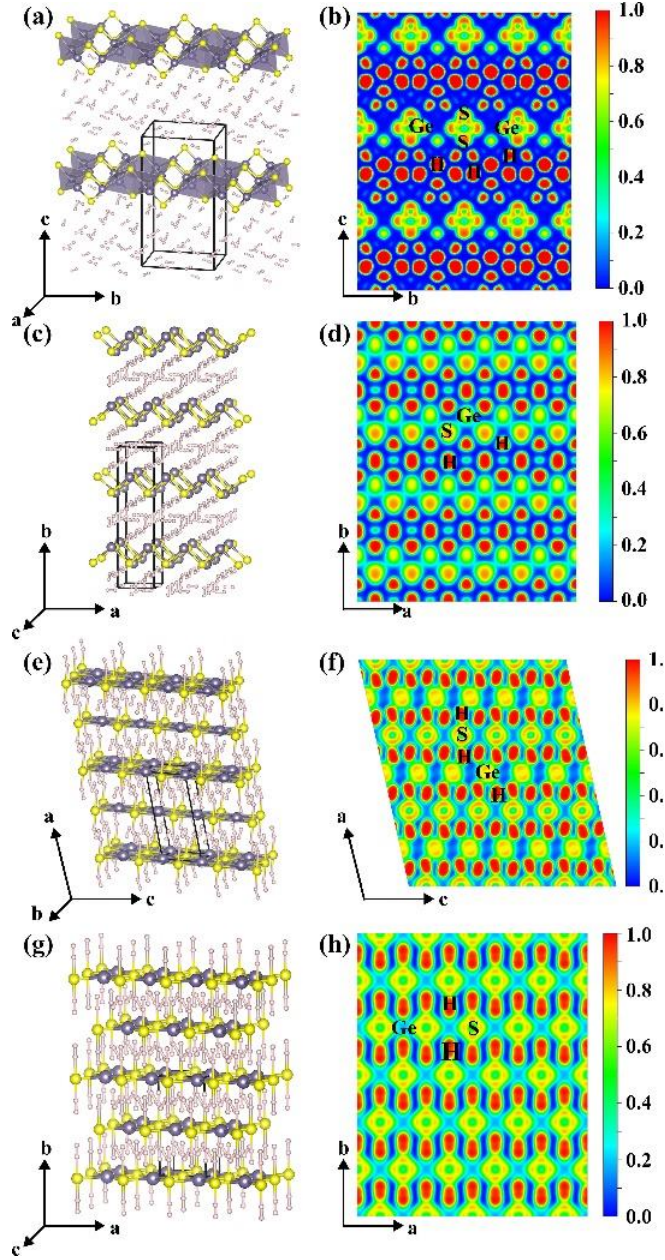

FIG. S5 The optimized crystal structures and corresponding valence electron localization function (ELF) for  $\text{GeSH}_8$  at high pressure. (a) The  $Cm$  phase at 0 GPa and its ELF at (b). (c) The  $Cmcm$  phase at 20 GPa and its ELF at (d). (e) The  $C2/m$  phase at 80 GPa and its ELF at (f). (g) The  $Cmmm$  phase at 160 GPa and its ELF at (h). Purple, yellow and pink spheres represent Ge, S and H atoms, respectively.



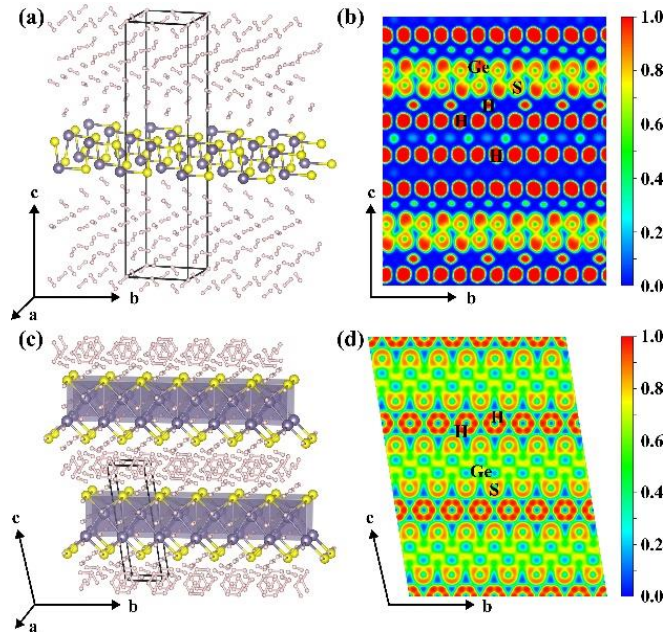

FIG. S6 The optimized crystal structures and corresponding valence electron localization function (ELF) for  $\text{GeSH}_{12}$  at high pressure. (a) The  $C2$  phase at 0 GPa and its ELF at (b). (c) The  $P-1$  phase at 120 GPa and its ELF at (d). Purple, yellow and pink spheres represent Ge, S and H atoms, respectively.

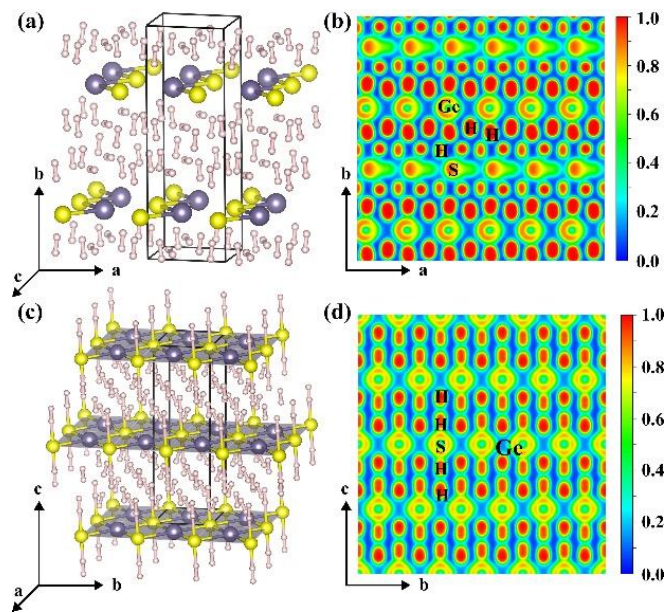

FIG. S7 The optimized crystal structures and corresponding valence electron localization function (ELF) for  $\text{GeSH}_{16}$  at high pressure. (a) The  $P2_1/m$  phase at 60 GPa and its ELF at (b). (c) The  $P2_1/c$  phase at 100 GPa and its ELF at (d). Purple, yellow and pink spheres represent Ge, S and H atoms, respectively.

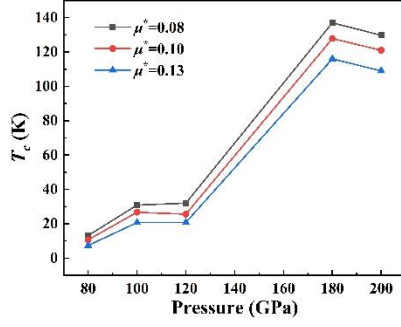

FIG. S8 The calculated  $T_c$  values of  $P2_1/m$  GeSH<sub>14</sub> at various pressures by taking a series of  $\mu^* = 0.08, 0.1$  and  $0.13$ .

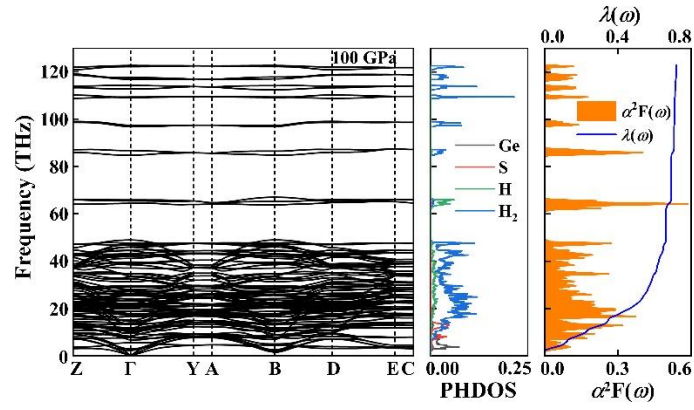

FIG. S9 The calculated phonon dispersions, phonon density of states (PHDOS), the Eliashberg spectral function  $\alpha^2F(\omega)$  (orange area) and frequency-dependent electron–phonon coupling parameters  $\lambda(\omega)$  (blue line) of  $P2_1/m$ -I GeSH<sub>14</sub> at 100 GPa.

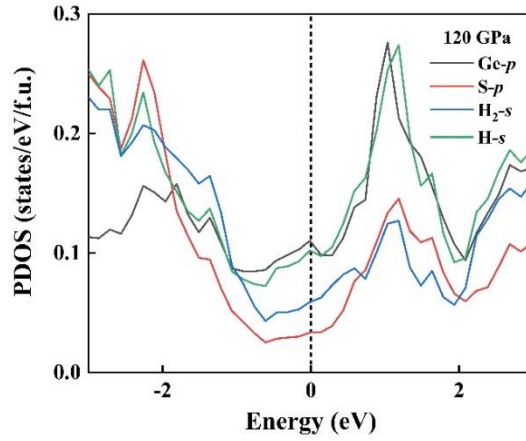

FIG. S10 Calculated partial density of states (PDOS) of  $P2_1/m$ -I GeSH<sub>14</sub> at 120 GPa

TABLE S1. Structural information of  $P2_1/m$ -I and  $P2_1/m$ -II phases of  $\text{GeSH}_{14}$ ,  $P2_1/m$  and  $P2_1/c$  phases of  $\text{GeSH}_{16}$ .

| Phase                           | Pressure (GPa) | Lattice parameters ( $\text{\AA}$ , $^\circ$ ) | Wyckoff positions (fractional) |         |        |        |
|---------------------------------|----------------|------------------------------------------------|--------------------------------|---------|--------|--------|
|                                 |                |                                                | Atom                           | x       | y      | z      |
| $P2_1$ $\text{GeSH}_{14}$       | 20             | $a= 5.1173$<br>$b= 5.1618$<br>$c= 6.7489$      | Ge(2a)                         | 0.6849  | 0.3557 | 0.5028 |
|                                 |                |                                                | S(2a)                          | 0.2529  | 0.2801 | 0.5241 |
|                                 |                |                                                | H(2a)                          | -0.0097 | 0.5179 | 0.1383 |
|                                 |                |                                                | H(2a)                          | 0.9372  | 0.9685 | 0.7738 |
|                                 |                |                                                | H(2a)                          | 0.0640  | 0.1258 | 0.2065 |
|                                 |                |                                                | H(2a)                          | 0.2419  | 0.2797 | 0.8738 |
|                                 |                |                                                | H(2a)                          | 0.5317  | 0.5160 | 0.1451 |
|                                 |                |                                                | H(2a)                          | 0.5904  | 0.9756 | 0.8026 |
|                                 |                |                                                | H(2a)                          | 0.4782  | 0.5239 | 0.8438 |
|                                 |                |                                                | H(2a)                          | 0.4109  | 0.1120 | 0.1814 |
|                                 |                |                                                | H(2a)                          | 0.2936  | 0.8060 | 0.0360 |
|                                 |                |                                                | H(2a)                          | 0.1951  | 0.7436 | 0.9717 |
|                                 |                |                                                | H(2a)                          | 0.7889  | 0.2585 | 0.6985 |
|                                 |                |                                                | H(2a)                          | 0.7672  | 0.2313 | 0.3089 |
|                                 |                |                                                | H(2a)                          | -0.0164 | 0.5105 | 0.8495 |
|                                 |                |                                                | H(2a)                          | 0.7540  | 0.7951 | 0.0158 |
|                                 |                |                                                | Ge(2e)                         | 0.2335  | 0.2500 | 0.2876 |
|                                 |                |                                                | S(2e)                          | 0.7428  | 0.2500 | 0.2266 |
|                                 |                |                                                | H(2e)                          | 0.9561  | 0.2500 | 0.8926 |
|                                 |                |                                                | H(2e)                          | 0.9751  | 0.2500 | 0.3385 |
| H(2e)                           | 0.4041         | 0.2500                                         | 0.9430                         |         |        |        |
| H(2e)                           | 0.0848         | 0.2500                                         | 0.7268                         |         |        |        |
| H(2e)                           | 0.5980         | 0.2500                                         | 0.8011                         |         |        |        |
| H(2e)                           | 0.5591         | 0.2500                                         | 0.3874                         |         |        |        |
| H(2e)                           | 0.4115         | 0.2500                                         | 0.7274                         |         |        |        |
| H(2e)                           | 0.9007         | 0.2500                                         | 0.7495                         |         |        |        |
| H(2e)                           | 0.0941         | 0.2500                                         | 0.9523                         |         |        |        |
| H(2e)                           | 0.5089         | 0.7500                                         | 0.6537                         |         |        |        |
| H(2e)                           | 0.1324         | 0.7500                                         | 0.7625                         |         |        |        |
| H(2e)                           | 0.4576         | 0.7500                                         | 0.0779                         |         |        |        |
| H(2e)                           | 0.9539         | 0.7500                                         | 0.6201                         |         |        |        |
| H(2e)                           | 0.6258         | 0.7500                                         | 0.6600                         |         |        |        |
| Ge(2e)                          | 0.72342        | 0.2500                                         | 0.8298                         |         |        |        |
| S(2e)                           | 0.2175         | 0.2500                                         | 0.3305                         |         |        |        |
| $P2_1/m$ -II $\text{GeSH}_{14}$ | 140            | $a=3.2751$<br>$b=9.5446$<br>$c=3.0294$         | H(4f)                          | 0.4879  | 0.0706 | 0.8611 |
|                                 |                |                                                | H(4f)                          | 0.8834  | 0.9943 | 0.7360 |
|                                 |                |                                                | H(4f)                          | 0.6185  | 0.0442 | 0.3279 |
|                                 |                |                                                | H(4f)                          | 0.7358  | 0.5943 | 0.1735 |
|                                 |                |                                                | H(4f)                          | 0.0829  | 0.5814 | 0.1569 |



TABLE S2. Superconducting properties of GeSH<sub>16</sub> under pressure. The  $\mu^*$  value for the  $T_c$  calculation is 0.1.

| Phase    | Pressure (GPa) | $\lambda$ | $\omega_{\log}$ (K) | $N(E_f)$ (states/Ry) | $T_c$ (K) |
|----------|----------------|-----------|---------------------|----------------------|-----------|
| $P2_1/m$ | 60             | 0.58      | 333.6               | 6.9                  | 5.3       |
|          | 80             | 0.83      | 249.8               | 4.2                  | 16.7      |
|          | 140            | 1.41      | 596.5               | 14.0                 | 63.7      |
| $P2_1/c$ | 160            | 1.70      | 481.3               | 14.1                 | 72.4      |
|          | 180            | 2.23      | 317.0               | 13.8                 | 62.1      |
|          | 200            | 1.26      | 561.2               | 11.7                 | 53.4      |
